# Supplementary material
Source: publisher site journal article supplement (https://www.spandidos-publications.com/3126/downloadSupplementary)
Supplement: Supplementary file 2 [file downloadSupplementary]

## Sheet: Sheet1
Table SVII. Kyoto Encyclopedia of Genes and Genomes analysis of the potential targets of differentially expressed long non-coding RNAs regulated in a cis regulatory manner.
Category	Term	Count	%	P-value	Genes	List Total	Pop Hits	Pop Total	Fold Enrichment	Bonferroni	Benjamini	False discovery rate
KEGG_PATHWAY	rno05169:Epstein-Barr virus infection	11	1.62242	0.0233615	RT1-A1, HDAC2, PSMD11, MAPK8, ENTPD3, NFKB2, MAPK10, TAB2, PSMD8, NCOR2, SPN	255	148	7749	2.25859	0.997088	0.997088	26.3986
KEGG_PATHWAY	rno04115:p53 signaling pathway	7	1.03245	0.026674	CD82, ZMAT3, CDK6, SFN, ADGRB1, PTEN, SESN3	255	70	7749	3.03882	0.998742	0.964527	29.5706
KEGG_PATHWAY	rno03040:Spliceosome	10	1.47493	0.0343718	RBM22, DHX38, DDX39B, ZMAT2, TRA2A, XAB2, PRPF38B, CTNNBL1, PRPF40A, SMNDC1	255	136	7749	2.23443	0.999823	0.94385	36.4608
KEGG_PATHWAY	rno05200:Pathways in cancer	21	3.09735	0.035436	WNT5A, CEBPA, EPAS1, PDGFA, FGF17, GNA12, SMAD3, MLH1, LEF1, CDK6, NFKB2, GNG12, MAPK10, PTEN, HDAC2, KRAS, PLEKHG5, PTCH1, MAPK8, EGF, GNG5	255	396	7749	1.6115	0.999865	0.892244	37.3629
KEGG_PATHWAY	rno04978:Mineral absorption	5	0.737463	0.0377751	FTL1, ATP1B3, SLC30A1, MT2A, STEAP2	255	39	7749	3.89593	0.999926	0.850767	39.3041
KEGG_PATHWAY	rno04960:Aldosterone-regulated sodium reabsorption	5	0.737463	0.0442319	SGK1, KRAS, ATP1B3, NEDD4L, SFN	255	41	7749	3.70588	0.999986	0.844697	44.3781
KEGG_PATHWAY	rno05206:MicroRNAs in cancer	10	1.47493	0.0450646	BMI1, CYP24A1, KRAS, PDGFA, SLC7A1, EZH2, ZEB2, CDK6, PTEN, DNMT3B	255	143	7749	2.12505	0.999989	0.803498	45.0033
KEGG_PATHWAY	rno05210:Colorectal cancer	6	0.884956	0.0579927	KRAS, LEF1, MLH1, SMAD3, MAPK8, MAPK10	255	64	7749	2.8489	1	0.841903	53.9128
KEGG_PATHWAY	rno05212:Pancreatic cancer	6	0.884956	0.0579927	KRAS, SMAD3, MAPK8, CDK6, MAPK10, EGF	255	64	7749	2.8489	1	0.841903	53.9128
KEGG_PATHWAY	rno04728:Dopaminergic synapse	9	1.32743	0.0610879	PPP1R1B, GSK3A, KIF5C, MAPK8, GNG12, MAPK10, GNG5, PPP2R2D, PPP2R3C	255	129	7749	2.12011	1	0.822701	55.8382
KEGG_PATHWAY	rno00062:Fatty acid elongation	4	0.589971	0.0679987	MECR, TECR, HADHB, ACOT3	255	29	7749	4.19148	1	0.824374	59.8721
KEGG_PATHWAY	rno04068:FoxO signaling pathway	9	1.32743	0.0779447	SGK1, KRAS, SETD7, SMAD3, MAPK8, MAPK10, EGF, FOXO4, PTEN	255	136	7749	2.01099	1	0.838328	65.0836
KEGG_PATHWAY	rno05218:Melanoma	6	0.884956	0.0827049	KRAS, PDGFA, FGF17, CDK6, EGF, PTEN	255	71	7749	2.56802	1	0.830835	67.3501
KEGG_PATHWAY	rno05213:Endometrial cancer	5	0.737463	0.0899252	KRAS, LEF1, MLH1, EGF, PTEN	255	52	7749	2.92195	1	0.833097	70.5299
KEGG_PATHWAY	rno00410:beta-Alanine metabolism	4	0.589971	0.0990513	MLYCD, UPB1, SMOX, ALDH3A2	255	34	7749	3.57509	1	0.841226	74.14
